# Supplementary material for: RIG-I recognizes metabolite-capped RNAs as signaling ligands
Source: PubMed Central journal article supplement (PMC10450190; doi:10.1093/nar/gkad518), 2023-06-16
Supplement: gkad518_supplemental_file.pdf [file gkad518_supplemental_file.pdf]

| Oligo                                 | Sequence                                                                              |
|---------------------------------------|---------------------------------------------------------------------------------------|
| T7 Transcription ss39 nontemplate DNA | 5'- CAG TAA TACGAC TCA CTA TTA GTT GGT GGT TGT TGT GTG TTT GTG GTT GGT TTG TTT GG -3' |
| T7 Transcription ss39 template DNA    | 5'- GTC ATT ATG CTG AGT GAT AAT CAA CCA CCA ACA CAC AAA CAC CAA CCA AAC AAA CC -3'    |
| Transcribed ss39 RNA                  | 5'- XGU UGG UGG UUG UUG UGU GUU UGU GGU UGG UUU GUU UGG -3'                           |
| Complementary ss39 RNA                | 5'- dT(Fam-T)dT CCA AAC AAA CCA ACC ACA AAC ACA CAA CAA CCA CCA ACU -3'               |
| 5' OH 5' OVG ss41 RNA                 | 5'- AG AGU UGG UGG UUG UUG UGU GUU UGU GGU UGG UUU GUU UGG -3'                        |
| 5' PPP ss14 chimera RNA               | 5'- CGU GAG ACA UA dGdCdG -3'                                                         |
| Complementary ss14 chimera RNA        | 5'- dCdGdC UA UGU CUC ACG -FI-3'                                                      |
| 5' PPP ss27 RNA                       | 5'- AUA CGU CCU GAU AGU UAG UAU CCA UCG -3'                                           |
| Complementary ss27 RNA                | 5'- Biotin – CGA UGG AUA CUA ACU AUC AGG ACG UAU – DY547 -3'                          |
| GAPDH Forward Primer                  | 5'- TCTCTGCCCCCTCTGCTG -3'                                                            |
| GAPDH Reverse Primer                  | 5'- AGTCCTTCCACGATACCAAA -3'                                                          |
| IFNB Forward Primer                   | 5'- GGGACTGGACAATTGCTTCAA -3'                                                         |
| IFNB Reverse Primer                   | 5'- GCAGTACATTAGCCATCAGTCACTTAA -3'                                                   |
| ISG15 Forward Primer                  | 5'- GAGAGGCAGCGAACTCATCT -3'                                                          |
| ISG15 Reverse Primer                  | 5'- CTTCAGCTCTGACACCGACA -3'                                                          |
| OAS1 Forward Primer                   | 5'- GAAGGAAAGGTGCTTCCGAGGTAG -3'                                                      |
| OAS1 Reverse Primer                   | 5'- AAGACAACCAGGTCAGCGTCAGAT -3'                                                      |
| MX1 Forward Primer                    | 5'- CTGGGATTTTGGGGCTTT -3'                                                            |
| MX1 Reverse Primer                    | 5'- GGGATGTGGCTGGAGATG -3'                                                            |

**Supplemental Table 1.** Oligonucleotide sequences used in this study. Transcribed ss39 RNA was in vitro transcribed, and the 5' 'X' indicates that this position could either be a 5' PPP or a metabolite cap. DNA nucleotides are indicated with a preceding "d" in RNA oligonucleotides. "Fam-T" indicates a T labeled with fluorescein. 3' "FI" indicates fluorescein.



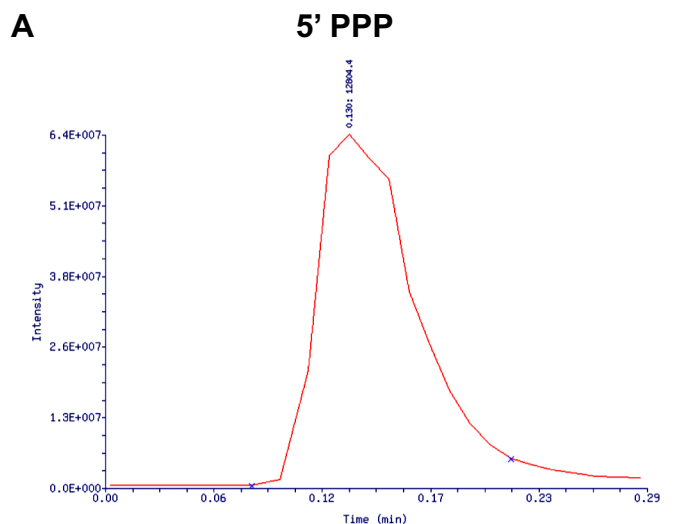

| Peak Mass (Da) | MS Peak Area       | MS Peak Percent |
|----------------|--------------------|-----------------|
| 12804.4        | $2.16 \times 10^8$ | 100             |

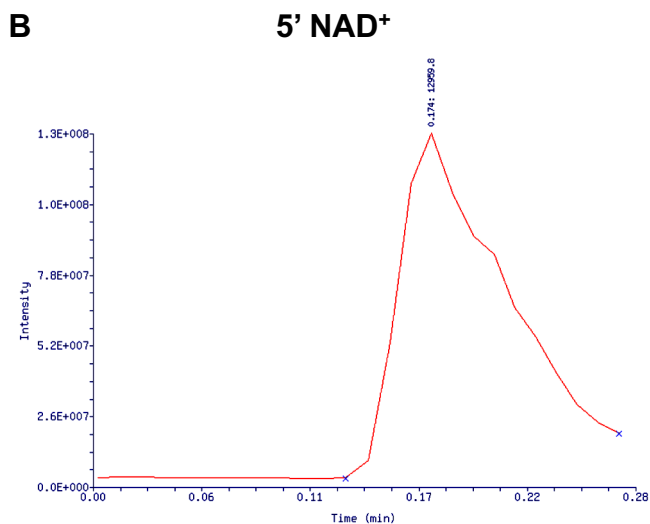

| Peak Mass (Da) | MS Peak Area       | MS Peak Percent |
|----------------|--------------------|-----------------|
| 12959.8        | $4.30 \times 10^8$ | 100             |

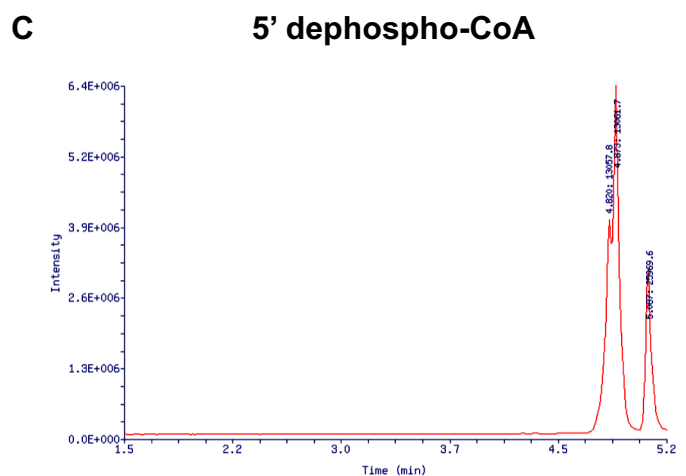

| Peak Mass (Da) | MS Peak Area       | MS Peak Percent |
|----------------|--------------------|-----------------|
| 13057.8        | $5.38 \times 10^5$ | 40.34           |
| 13061.7        | $6.32 \times 10^5$ | 47.42           |
| 25969.6        | $1.63 \times 10^5$ | 12.24           |

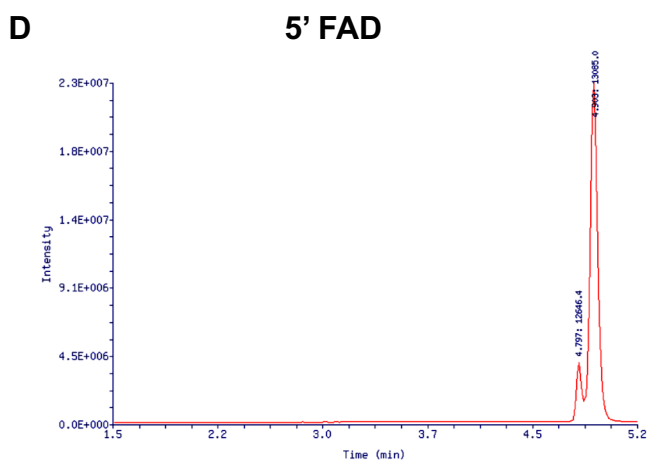

| Peak Mass (Da) | MS Peak Area       | MS Peak Percent |
|----------------|--------------------|-----------------|
| 12646.4        | $2.85 \times 10^5$ | 10.80           |
| 13085.0        | $3.26 \times 10^6$ | 89.20           |

**Supplemental Figure 2, Related to Figure 2.**

MS curves for 5' PPP (A), NAD<sup>+</sup> (B), FAD (C), and dephospho-CoA (D). Below each curve is a table describing the peaks. Note that each RNA was assayed for purity asynchronously and under different methods; thus, each RNA's x-axis (retention time) is not directly comparable.

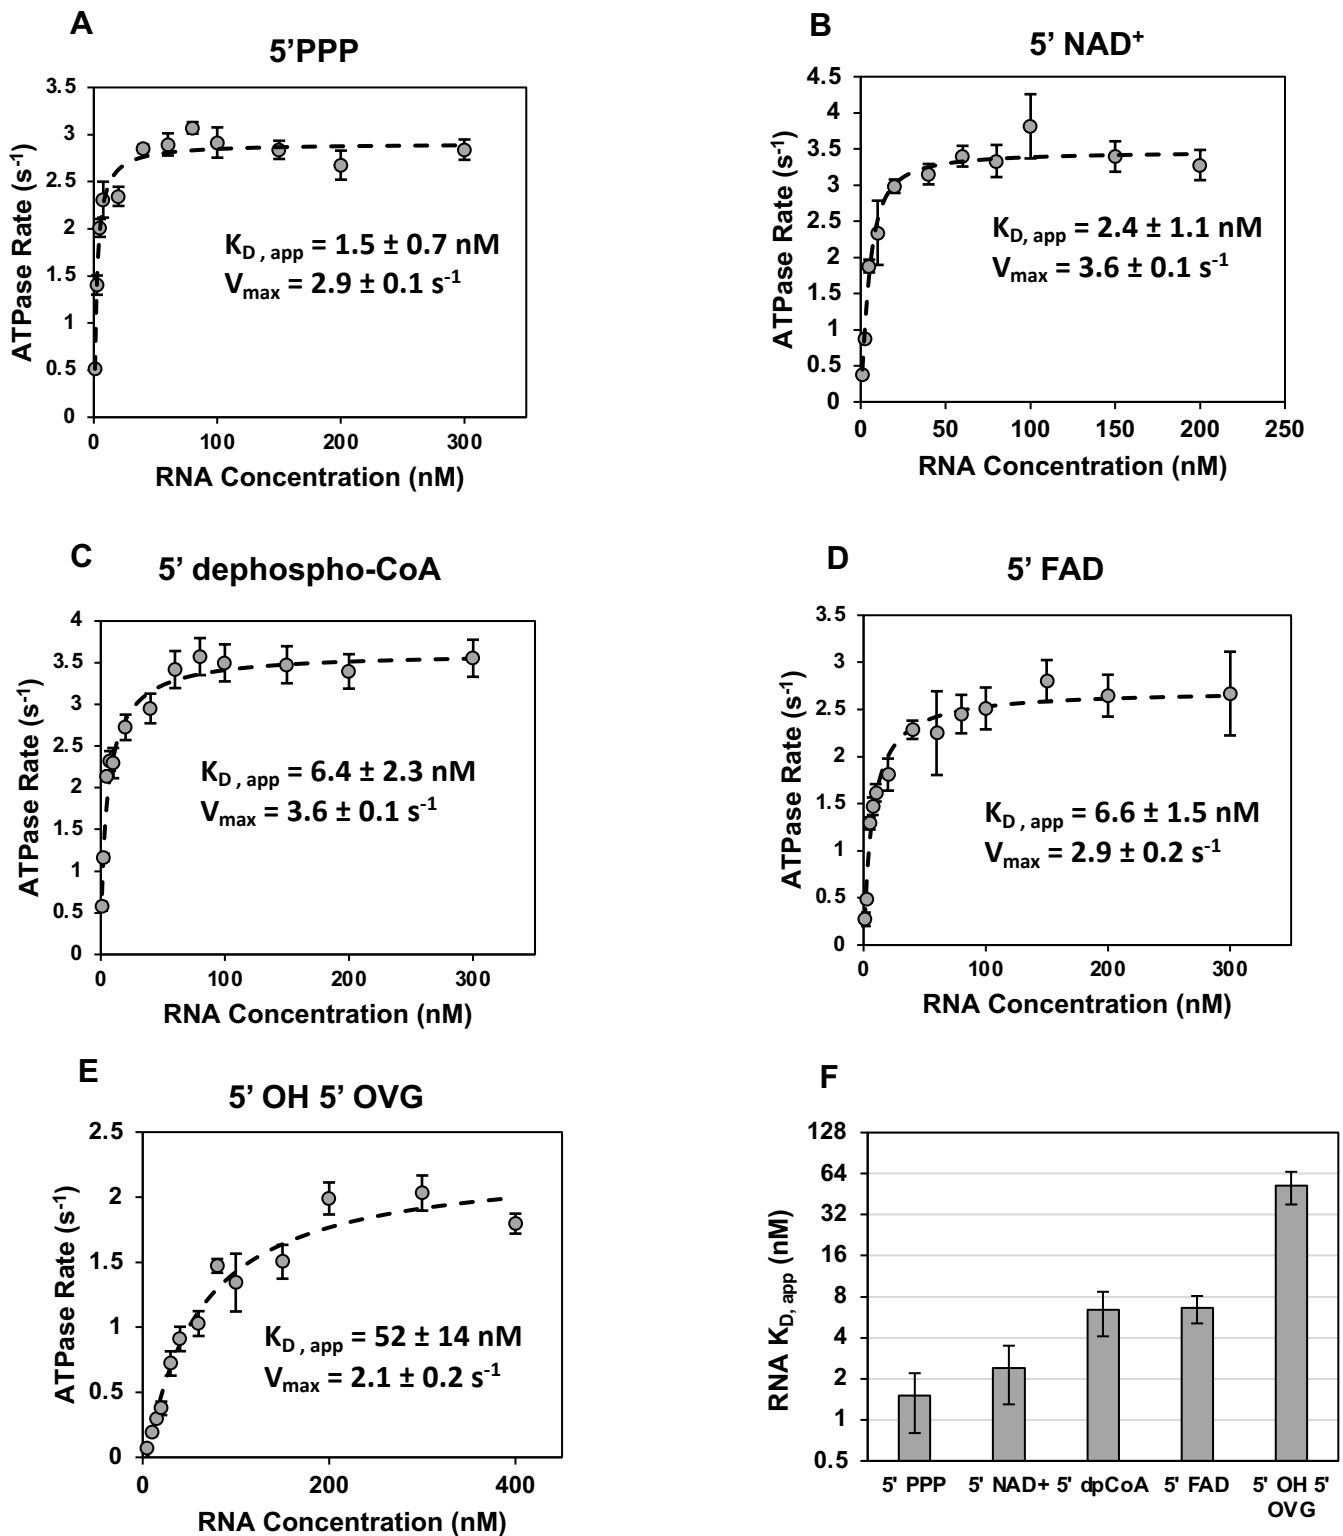

**Supplemental Figure 3, related to Figure 3. RIG-I can bind to and hydrolyze ATP using metabolite-capped RNAs effectively.**

(A) – (E) RIG-I (15 nM) was incubated with 2 mM ATP spiked with [ $\gamma$ -<sup>32</sup>P]-ATP, 1x ATPase Buffer, and increasing concentrations of either (A) 5' PPP ds39 RNA, (B) 5' NAD<sup>+</sup> ds39 RNA, (C) 5' dephospho-CoA ds39 RNA, (D) 5' FAD ds39 RNA, or (E) 5' OH 5' 2nt overhang RNA. Each point represents an individual reaction run with time points of either 0", 20", 40", or 60" and fit with a linear equation. Error bars are from each linear fit of three technical replicates per point (n = 3). Each overall reaction was fit using a quadratic equation (dashed lines, Equation 1), and both  $K_{D,app}$  and  $V_{max}$  were derived from this fit. The fit determined errors for these two values.

(F) Bar graph compilation of  $K_{D,app}$  data shown in (A) – (E). Note the log<sub>2</sub> y-axis scale.

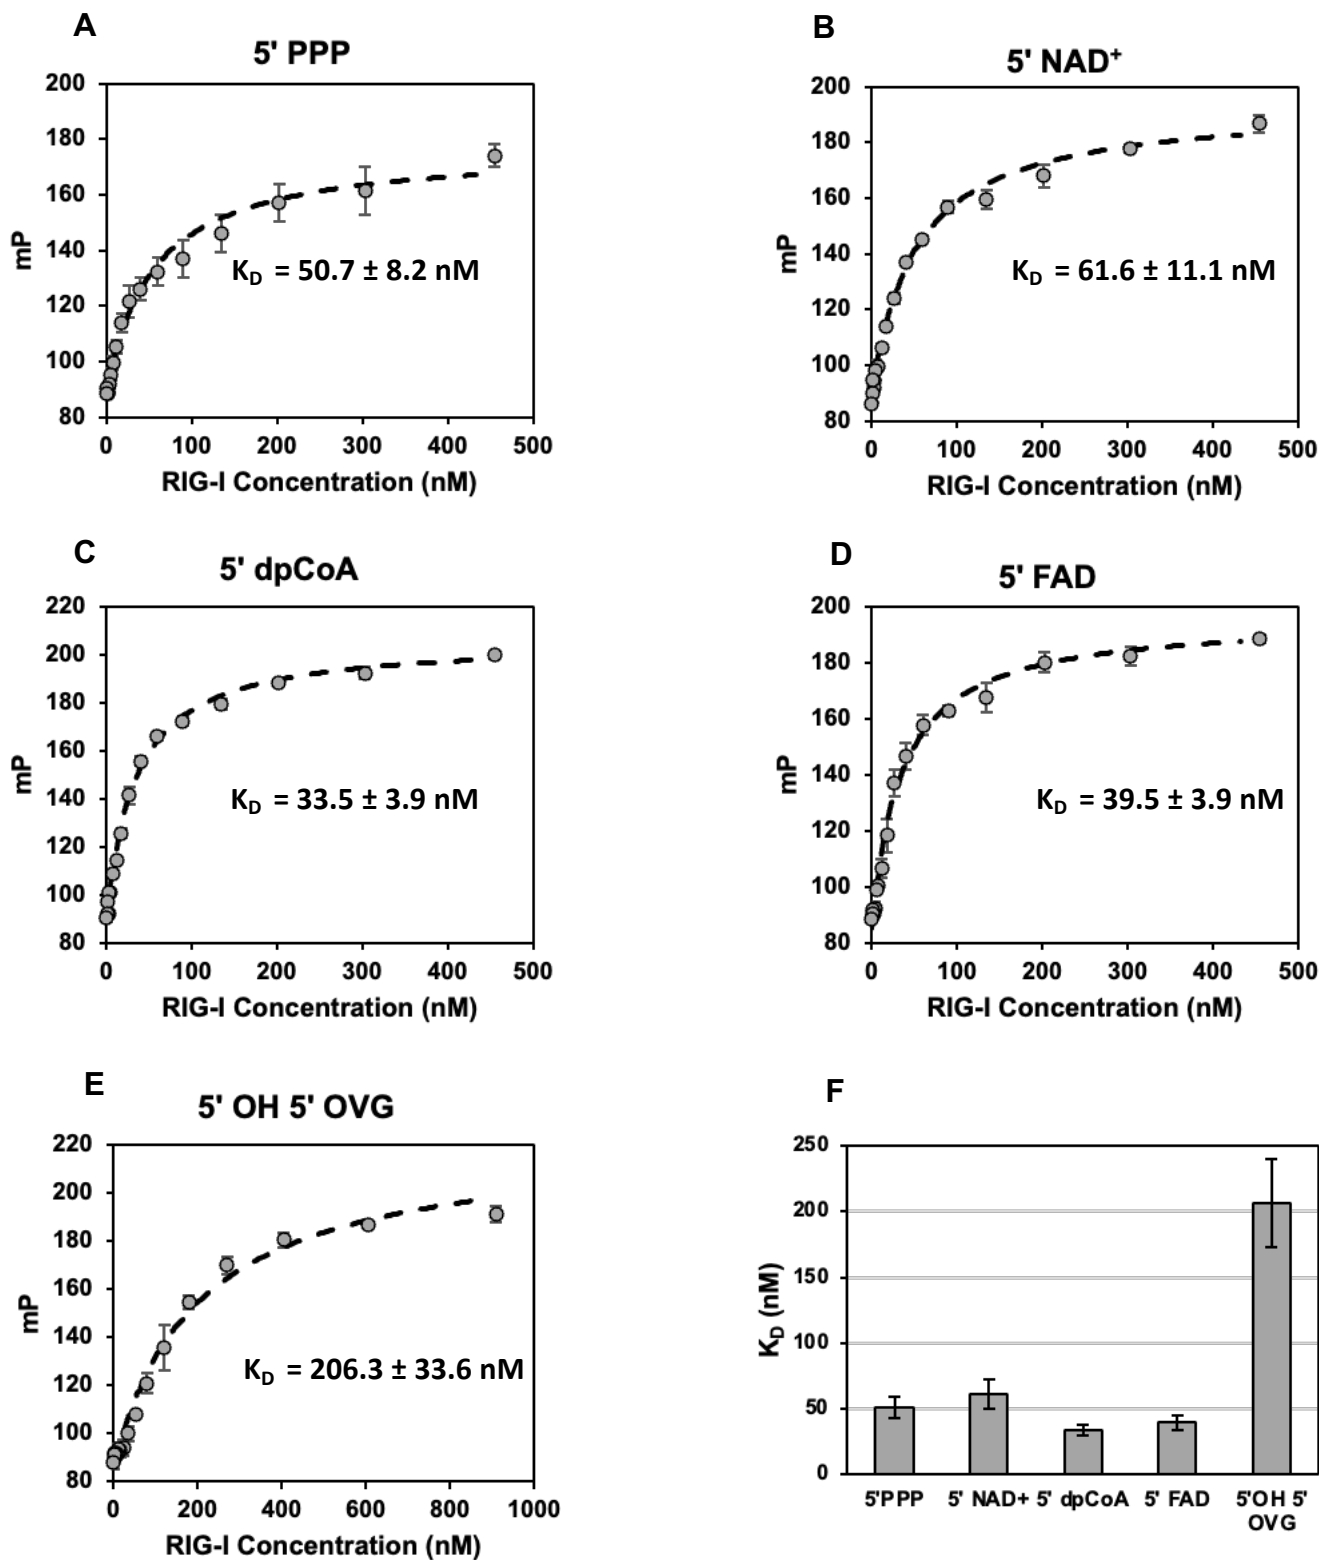

**Supplemental Figure 4, related to Figure 3. RIG-I directly binds metabolite-capped RNAs comparably to 5' PPP.** (A) – (E) Fluorescein-labelled RNA (20 nM), either (A) 5' PPP ds39 RNA, (B) 5' NAD<sup>+</sup> ds39 RNA, (C) 5' dephospho-CoA ds39 RNA, (D) 5' FAD ds39 RNA, or (E) 5' OH 5' 2nt overhang was incubated with 0.5 mM ATP, 1x ATPase Buffer and increasing concentrations RIG-I, and fluorescence polarization was measured (mP). Each point represents an average of three trials; error bars are the standard error of these three trials (n=3). Each overall reaction was fit using a hyperbolic equation (dashed lines, Equation 2 and 3) to estimate the  $K_D$  values. (F) Bar graph compilation of  $K_D$  data shown in (A) – (E). Error bars are from each fit of three technical replicates per point (n = 3).

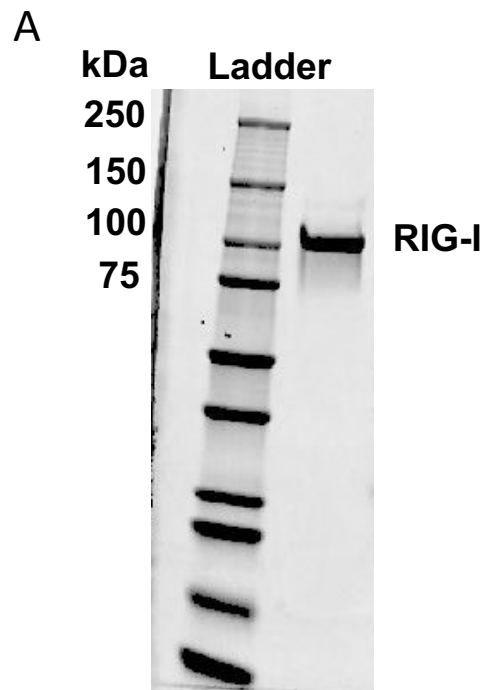

**Supplementary Figure 5, related to Figure 3.**

(A) Purified full-length RIG-I was used in this study. The predicted mass of full-length RIG-I is 106.6 kDa.

A

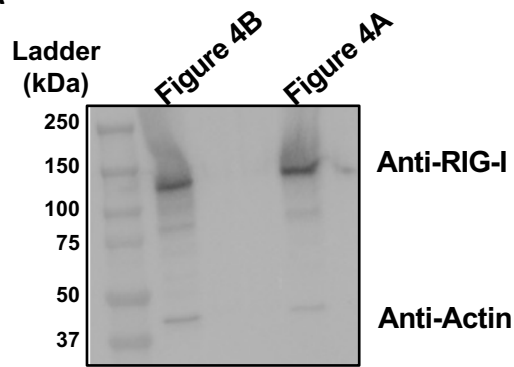

B

| Reverse transcription reaction-<br>HEK293T RIG-I KO |              |                        |                            |                           |                                        |                                           |                                       |
|-----------------------------------------------------|--------------|------------------------|----------------------------|---------------------------|----------------------------------------|-------------------------------------------|---------------------------------------|
| Label#                                              | Plasmid      | RNA                    | RNA Stock<br>(ng/ $\mu$ l) | Vol. of RNA<br>( $\mu$ l) | Vol. of H <sub>2</sub> O<br>( $\mu$ l) | Total RNA for<br>RT in 10 $\mu$ l<br>(ng) | 2 x<br>RT Master<br>Mix<br>( $\mu$ l) |
| R01                                                 | mock EV      | No RNA                 | 1112.6                     | 1.35                      | 8.65                                   | 1500                                      | 10                                    |
| R02                                                 | mock EV      | 5'PPP ds39             | 1253.2                     | 1.20                      | 8.80                                   | 1500                                      | 10                                    |
| R03                                                 | mock EV      | NAD <sup>+</sup> -ds39 | 1348.6                     | 1.11                      | 8.89                                   | 1500                                      | 10                                    |
| R04                                                 | mock EV      | 5'OVG 5'OH ds39        | 1089.4                     | 1.38                      | 8.62                                   | 1500                                      | 10                                    |
| R05                                                 | WT RIG-I Myc | No RNA                 | 1539.6                     | 0.97                      | 9.03                                   | 1500                                      | 10                                    |
| R06                                                 | WT RIG-I Myc | 5'PPP ds39             | 1362                       | 1.10                      | 8.90                                   | 1500                                      | 10                                    |
| R07                                                 | WT RIG-I Myc | NAD <sup>+</sup> -ds39 | 760.7                      | 1.97                      | 8.03                                   | 1500                                      | 10                                    |
| R08                                                 | WT RIG-I Myc | 5'OVG 5'OH ds39        | 708.3                      | 2.12                      | 7.88                                   | 1500                                      | 10                                    |

| 2 x RT Master Mix Components      | Volume ( $\mu$ l) |
|-----------------------------------|-------------------|
| 10 x RT Buffer                    | 2                 |
| 25 x dNTP Mix (100 mM)            | 0.8               |
| 10 x RT Random primers            | 2                 |
| MultiScribe Reverse Transcriptase | 1                 |
| Nuclease free H <sub>2</sub> O    | 4.2               |
| <b>Total per reaction</b>         | <b>10</b>         |

| cDNA Synthesis |         |       |       |
|----------------|---------|-------|-------|
| Step1          | Step2   | Step3 | Step4 |
| 25 °C          | 37 °C   | 85 °C | 4 °C  |
| 10 min         | 120 min | 5 min | hold  |

#### Supplemental Figure 6, Related to Figure 4.

(A) Western blot confirming expression of myc-tagged RIG-I in cell signaling reporter assays (Figures 4A and 4B).  
 (B) Tables of the reverse transcription reaction mixtures and cDNA synthesis PCR condition for total RNA extracted from HEK293T RIG-I KO cells transfected with EV and Myc-tagged RIG-I.

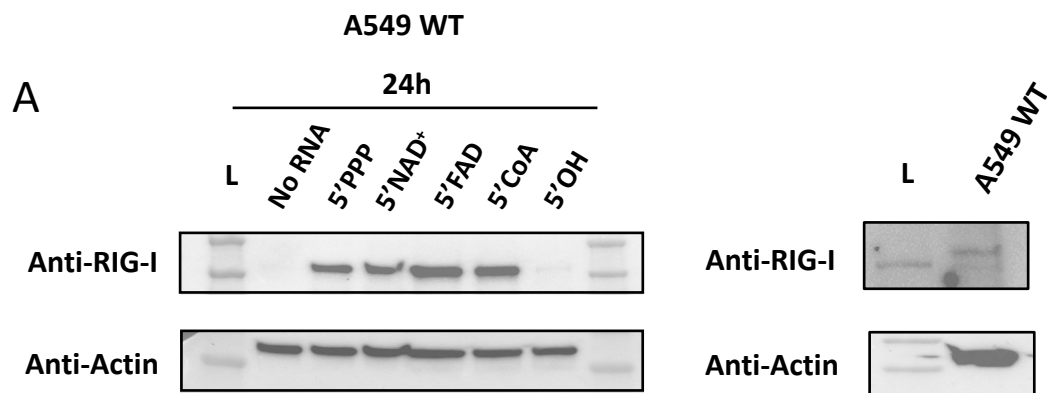

**B**

| Reverse transcription reaction -A549 cells |              |                          |                 |                   |             |                           |                  |
|--------------------------------------------|--------------|--------------------------|-----------------|-------------------|-------------|---------------------------|------------------|
| Label#                                     | Cells        | RNA                      | Stock RNA Conc. | Vol. of Stock RNA | Vol. of H2O | Total RNA f or RT in 10ul | 2X RT Master Mix |
|                                            |              | Condition                | (ng/ul)         | (ul)              | (ul)        | (ng)                      | (ul)             |
| R01                                        | A549 WT      | No RNA                   | 819.3           | 1.83              | 8.17        | 1500                      | 10               |
| R02                                        | A549 WT      | 5'PPP ds39               | 708.5           | 2.12              | 7.88        | 1500                      | 10               |
| R03                                        | A549 WT      | 5' NAD <sup>+</sup> ds39 | 821.5           | 1.83              | 8.17        | 1500                      | 10               |
| R04                                        | A549 WT      | 5' dpCoA ds 39           | 711             | 2.11              | 7.89        | 1500                      | 10               |
| R05                                        | A549 WT      | 5' FAD ds39              | 834.3           | 1.80              | 8.20        | 1500                      | 10               |
| R06                                        | A549 WT      | 5' OH 5' OVGds39         | 865.9           | 1.73              | 8.27        | 1500                      | 10               |
| R07                                        | A549 RIGI KO | No RNA                   | 976.7           | 1.54              | 8.46        | 1500                      | 10               |
| R08                                        | A549 RIGI KO | 5'PPP ds39               | 914.7           | 1.64              | 8.36        | 1500                      | 10               |
| R09                                        | A549 RIGI KO | 5' NAD <sup>+</sup> ds39 | 959.4           | 1.56              | 8.44        | 1500                      | 10               |
| R10                                        | A549 RIGI KO | 5' dpCoA ds 39           | 984.3           | 1.52              | 8.48        | 1500                      | 10               |
| R11                                        | A549 RIGI KO | 5' FAD ds39              | 955             | 1.57              | 8.43        | 1500                      | 10               |
| R12                                        | A549 RIGI KO | 5' OH 5' OVGds39         | 892.7           | 1.68              | 8.32        | 1500                      | 10               |

**Supplemental Figure 7, Related to Figure 5.**

(A) Western blot confirming expression of endogenous RIG-I in A549 cell after 24 h RNA transfection (Figure 5). Fresh antibody dilution of 1:500 was used, and the blot was overexposed to visualize the trace amount of endogenous RIG-I. (B) Table shows total RNA extracted and reverse transcription reaction mixture conditions. cDNA synthesis reaction mixture and PCR conditions are the same as in Supplemental Figure 6B.
